# Supplementary material for: Gaming With Stigma: Analysis of Messages About Mental Illnesses in Video Games
Source: PubMed Central journal article supplement (PMC6707601; doi:10.2196/12418), 2019-05-08
Supplement: mental_v6i4e12418_app1.pdf [file mental_v6i4e12418_app1.pdf]

| Game title                         | Total number of gamer reviews posted on Steam | Percent of gamer reviews that are positive | Cost of game in CAD (\$) | Viewing restriction (age restriction or "not safe for work" restriction) |
|------------------------------------|-----------------------------------------------|--------------------------------------------|--------------------------|--------------------------------------------------------------------------|
| <b>Keyword: Insane (n=25)</b>      |                                               |                                            |                          |                                                                          |
| Abandoned Hospital VR              | 3                                             | 67%                                        | 6.49                     | No                                                                       |
| Black Mirror                       | 104                                           | 41%                                        | 32.99                    | Yes                                                                      |
| Chaser                             | 600                                           | 76%                                        | 5.49                     | No                                                                       |
| Corridor 15                        | 2                                             | 100%                                       | 5.69                     | No                                                                       |
| Dimension Hunter VR                | 60                                            | 76%                                        | 6.69                     | Yes                                                                      |
| Edge of Insanity                   | NA                                            | NA                                         | NA                       | No                                                                       |
| Gloom                              | 16                                            | 62%                                        | 10.99                    | No                                                                       |
| Insane Decay of Mind: The Labrynth | 28                                            | 39%                                        | 3.29                     | No                                                                       |
| Insanity VR: Last Score            | 103                                           | 86%                                        | Free                     | Yes                                                                      |
| Metonymy                           | 44                                            | 50%                                        | Free                     | Yes                                                                      |
| Observer                           | 1704                                          | 82%                                        | 32.99                    | No                                                                       |
| Orphan's Treasure                  | NA                                            | NA                                         | NA                       | NA                                                                       |
| Ouroboros: Prelude                 | 6                                             | 50%                                        | 8.79                     | Yes                                                                      |
| Psychical Madness                  | 12                                            | 50%                                        | 4.49                     | No                                                                       |
| Rise of Insanity                   | 287                                           | 80%                                        | 11.49                    | No                                                                       |
| Road Rage                          | 12                                            | 16%                                        | 39.99                    | No                                                                       |
| Roots of Insanity                  | 184                                           | 72%                                        | 0.77                     | Yes                                                                      |
| Sinistry Silinium                  | 50                                            | 74%                                        | 5.49                     | Yes                                                                      |
| Status: Insane                     | 20                                            | 95%                                        | 5.49                     | No                                                                       |
| Stay Woke: Ethereal Edition        | 4                                             | 75%                                        | 2.29                     | Yes                                                                      |
| The Scrungeon Depths               | 9                                             | 89%                                        | 8.99                     | Yes                                                                      |
| Tokyo Dark                         | 373                                           | 91%                                        | 19.99                    | No                                                                       |
| TRATEL64                           | 92                                            | 71%                                        | Free                     | Yes                                                                      |
| UNLOVED                            | 500                                           | 79%                                        | 10.99                    | Yes                                                                      |
| Unrested Development               | 8                                             | 63%                                        | 2.29                     | No                                                                       |

|                                         |                   |                   |                     |                     |
|-----------------------------------------|-------------------|-------------------|---------------------|---------------------|
| <b>Average (Range)</b>                  | 168.84 (2-1704)   | 144.35 (2 - 1397) | 9.81 (Free - 39.99) | 11 Yes; 13 No; 1 NA |
| <b>Keyword: Mad/Madness (n=25)</b>      |                   |                   |                     |                     |
| 101 Ways to Die                         | 17                | 70%               | 10.99               | No                  |
| Araya                                   | 327               | 76%               | 16.99               | Yes                 |
| Between Me and the Night                | 89                | 68%               | 16.99               | No                  |
| Corinne Cross's Dead & Breakfast        | 81                | 100%              | 5.49                | No                  |
| Dark Passenger                          | 10                | 60%               | 2.19                | Yes                 |
| Dark Throne                             | 28                | 50%               | 0.59                | No                  |
| Dead Stop                               | 3                 | 33%               | 7.99                | No                  |
| Downfall                                | 405               | 93%               | 12.49               | No                  |
| Embrace the Fear                        | 5                 | 60%               | 6.49                | No                  |
| Goetia                                  | 162               | 81%               | 16.99               | No                  |
| Last Answer                             | 48                | 33%               | 5.49                | No                  |
| Last Will                               | 64                | 67%               | 9.99                | No                  |
| Layers of Fear                          | 6831              | 91%               | 21.99               | No                  |
| Mad Father                              | 904               | 96%               | 5.49                | No                  |
| My Own Little Planet                    | 11                | 63%               | 6.49                | No                  |
| One Sole Purpose                        | 11                | 9%                | 8.79                | No                  |
| Outlast 2                               | 8834              | 86%               | 32.99               | Yes                 |
| Phobia                                  | 11                | 36%               | 6.49                | Yes                 |
| Reflection of Mine                      | 89                | 85%               | 8.79                | No                  |
| RoadkillerZ                             | 13                | 30%               | 4.49                | No                  |
| Shrouded in Sanity                      | 221               | 85%               | 5.69                | No                  |
| Strange Night                           | 78                | 53%               | 4.49                | No                  |
| The Dungeons of Castle Madness          | 10                | 80%               | 10.99               | Yes                 |
| The Infectious Madness of Doctor Dekker | 191               | 81%               | 9.99                | No                  |
| The Last Door: Season 2                 | 259               | 95%               | 10.99               | No                  |
| <b>Average (Range)</b>                  | 748.08 (3 - 8834) | 656.12 (1 - 7597) | 10.01               | 5 Yes; 20 No        |
| <b>Keyword: Crazy (n=16)</b>            |                   |                   |                     |                     |
| Academagia: The Making of Mages         | 131               | 72%               | 17.99               | No                  |
| Angels of Death                         | 1458              | 94%               | 10.99               | No                  |
| Breathing Fear                          | 110               | 83%               | 10.99               | No                  |

|                                                                                        |                   |                   |                      |                    |
|----------------------------------------------------------------------------------------|-------------------|-------------------|----------------------|--------------------|
| Carmageddon Max Damage                                                                 | 1132              | 76%               | 18.99                | No                 |
| Crazy Buggy Racing                                                                     | 10                | 20%               | 5.49                 | No                 |
| Crazy Max VR                                                                           | 10                | 20%               | 5.49                 | Yes                |
| Crazy Saloon VR                                                                        | 11                | 72%               | 10.99                | No                 |
| Crazy Sapper 3D                                                                        | 4                 | 50%               | 5.49                 | No                 |
| Gone in November                                                                       | 152               | 53%               | 1.09                 | Yes                |
| POSTAL Redux                                                                           | 944               | 90%               | 9.99                 | Yes                |
| Overdosed: A Trip to Hell                                                              | 12                | 58%               | 7.79                 | No                 |
| The Legend: A University Story                                                         | 11                | 64%               | Free                 | No                 |
| The Zombiest Adventures in the Perverted Age of Enlightenment with a Pinch of Woodpunk | NA                | NA                | NA                   | NA                 |
| Think to Die Episode 2                                                                 | 80                | 75%               | Free                 | No                 |
| Twisty's Asylum Escapades                                                              | 25                | 40%               | 5.49                 | Yes                |
| We Happy Few                                                                           | 3049              | 70%               | 74.99                | No                 |
| <b>Average (Range)</b>                                                                 | 475.93 (4 – 3049) | 371.80 (2 – 2134) | 12.38 (Free – 74.99) | 4 Yes; 11 No; 1 NA |
| <b>Keyword: Mental (n=13)</b>                                                          |                   |                   |                      |                    |
| AMOK                                                                                   | 119               | 37%               | 1.09                 | No                 |
| Blue Sheep                                                                             | 16                | 37%               | 2.19                 | No                 |
| Emporium                                                                               | 102               | 71%               | 2.19                 | Yes                |
| Horror Hospital                                                                        | 156               | 26%               | 1.19                 | Yes                |
| Horror in the Asylum                                                                   | 31                | 29%               | 5.49                 | No                 |
| Lithium: Inmate 39                                                                     | 21                | 57%               | 10.99                | Yes                |
| Midnight Carnival                                                                      | 64                | 26%               | 0.59                 | No                 |
| One Small Fire at a Time                                                               | 30                | 100%              | 10.99                | No                 |
| Phantasmagoria 2: A Puzzle of Flesh                                                    | 26                | 80%               | 7.79                 | No                 |
| Phantasmal: City of Darkness                                                           | 115               | 41%               | 16.99                | No                 |

|                                                |                        |                       |                        |              |
|------------------------------------------------|------------------------|-----------------------|------------------------|--------------|
| PSYCHO-PASS:<br>Mandatory<br>Happiness         | 29                     | 93%                   | 43.99                  | No           |
| The Hat Man:<br>Shadow Ward                    | 2937                   | 67%                   | 11.49                  | No           |
| The Sun Will Rise                              | 58                     | 51%                   | Free                   | No           |
| <b>Average (Range)</b>                         | 264.57 (16 -<br>2937)  | 165.85 (6 -<br>1968)  | 8.84 (Free -<br>43.99) | 3 Yes; 10 No |
| <b>Keyword: Asylum (n=14)</b>                  |                        |                       |                        |              |
| Arkham<br>Nightmares                           | 10                     | 20%                   | 3.29                   | No           |
| Awakened                                       | 3                      | 0%                    | 3.29                   | Yes          |
| Deceit                                         | 18717                  | 73%                   | 5.49                   | No           |
| Final Rest                                     | 11                     | 45%                   | 1.09                   | Yes          |
| Haunted Halls:<br>Green Hills<br>Sanitarium    | 4                      | 100%                  | 11.49                  | No           |
| Medford Asylum:<br>Paranormal Case             | 43                     | 46%                   | 6.49                   | No           |
| Mental Asylum VR                               | 26                     | 69%                   | 5.49                   | Yes          |
| Nightmare<br>Adventures: The<br>Witch's Prison | 4                      | 100%                  | 14.38                  | No           |
| Possessed                                      | 12                     | 58%                   | 4.99                   | Yes          |
| Project RPG                                    | 16                     | 31%                   | 1.19                   | Yes          |
| Redrum: Dead<br>Diary                          | 27                     | 55%                   | 7.79                   | No           |
| Shadows of<br>Kurgansk                         | 157                    | 64%                   | 6.49                   | Yes          |
| The Janitor                                    | 25                     | 20%                   | 1.09                   | Yes          |
| Turner                                         | 33                     | 93%                   | 3.29                   | No           |
| <b>Average (Range)</b>                         | 1363.43 (3 -<br>18717) | 991.36 (0 -<br>13663) | 5.42                   | 7 Yes; 7 No  |
| <b>Keyword: Psycho (n=4)</b>                   |                        |                       |                        |              |
| 2Dark                                          | 89                     | 73%                   | 28.99                  | No           |
| Slayaway Camp                                  | 409                    | 96%                   | 9.99                   | No           |
| The Puppet<br>Master                           | 34                     | 82%                   | Free                   | No           |
| UltraGoodness                                  | 89                     | 80%                   | 2.19                   | No           |
| <b>Average (Range)</b>                         | 155.25 (34 -<br>409)   | 139.25 (28 -<br>393)  | 10.29                  | 0 Yes; 4 No  |
| <b>Keyword: Psychosis (n=1)</b>                |                        |                       |                        |              |
| The Wendigo                                    | 16                     | 93%                   | 5.49                   | Yes          |
| <b>Keyword: Psychotic (n=1)</b>                |                        |                       |                        |              |

|                                                       |                       |                       |                        |                        |
|-------------------------------------------------------|-----------------------|-----------------------|------------------------|------------------------|
| Agatha Knife                                          | 88                    | 94%                   | 12.99                  | No                     |
| <b>Keyword: Schizophrenia (n=1)</b>                   |                       |                       |                        |                        |
| Invisible Mind                                        | 23                    | 34%                   | 0.60                   | No                     |
| <b>Total Average<br/>Across Key<br/>Words (Range)</b> | 558.11 (2 -<br>18717) | 434.68 (0 -<br>13663) | 9.37 (Free -<br>74.99) | 31 Yes; 67<br>No; 2 NA |
